# Supplementary material
Source: PubMed Central journal article supplement (PMC5140706)
Supplement: NIHMS827716-supplement.pdf [file NIHMS827716-supplement.pdf]

## Supplemental Figures and Legends

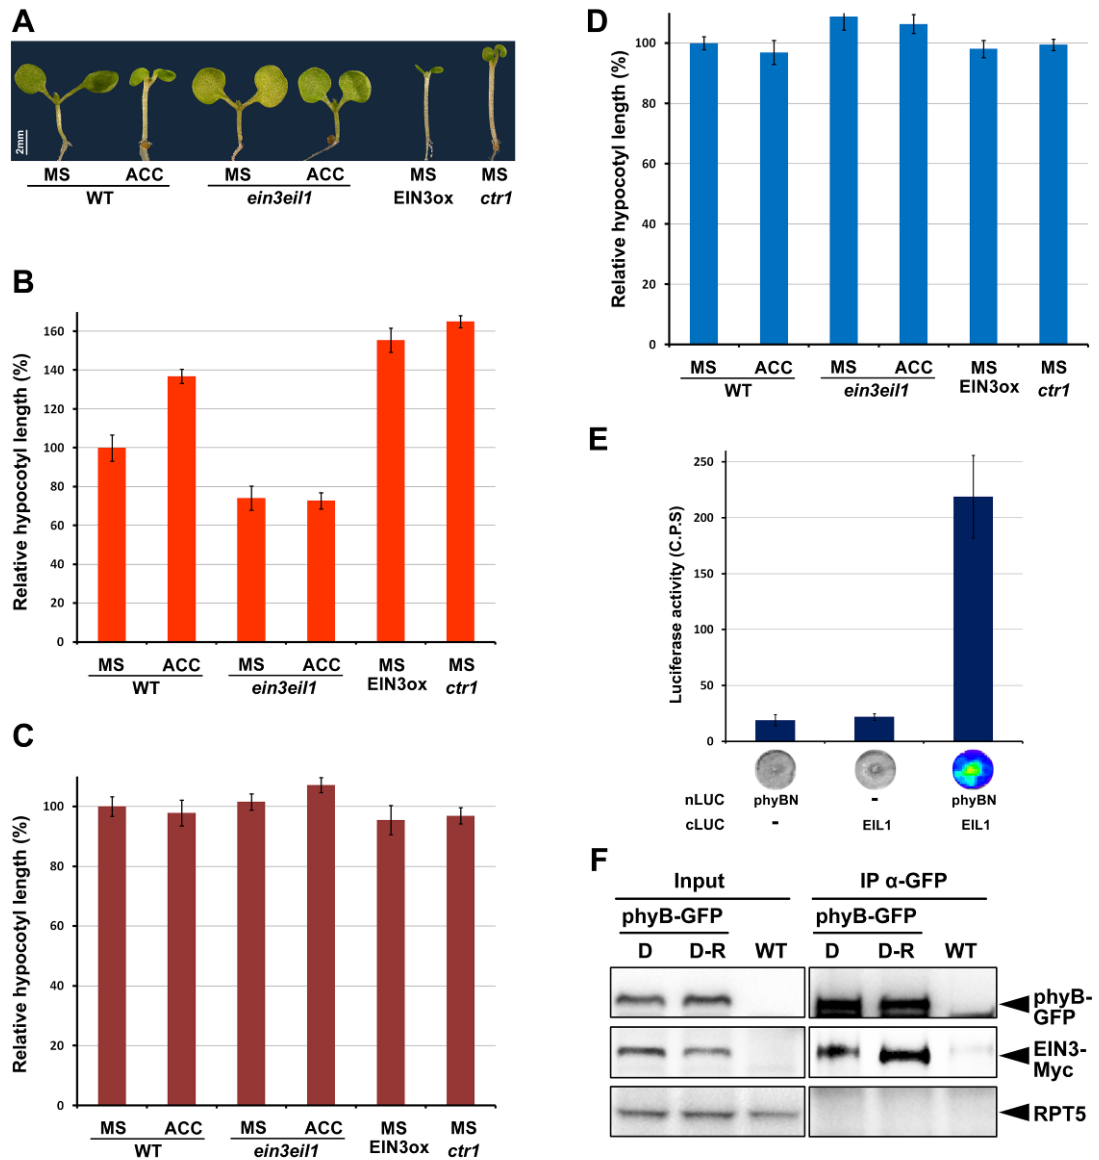

**Figure S1. EIN3 is a negative regulator of seedling photomorphogenesis and primarily associates with phyB in red light, related to Figure 1.**

(A) Images of seedling photomorphogenic phenotypes in red light. The seedlings were grown on 1/2 MS without (MS) or with 10  $\mu$ M ACC supplementation (ACC) under red light for 5 days.

(B-D) Hypocotyl lengths of 5 day-old WT, *ein3eil1*, EIN3ox and *ctr1* seedlings grown on 1/2 MS medium (MS) or 1/2 MS medium supplied with 10  $\mu$ M ACC (ACC) under continuous red light (B), far-red light (C), or blue light (D). Mean  $\pm$ s.d., n>20.

(E) LCI assay showing that EIL1 interacts with the N-terminus of phyB *in planta*. Full-length EIL1 fused with the split C-terminal (cLUC) fragments of luciferase and the N-terminal fragment of phyB (phyBN) fused with the split luciferase N-terminus (nLUC) reconstituted the luciferase activity in tobacco leaves. Empty vectors were used as negative controls. C.P.S is counts per second. Mean  $\pm$  s.d., n=5.

(F) Co-immunoprecipitation assays to determine the interaction of EIN3 and phyB proteins. WT and transgenic plants over-expressing EIN3-Myc in a 35S:phyB-GFP background (phyB-GFP) were grown on 1/2 MS medium with 10  $\mu$ M ACC supplementation for 4 days in the dark, and then either maintained in the dark (D) or exposed to red light (D-R) for 30 min. Extracted total proteins were immunoprecipitated using anti-GFP antibody and immunoblotted using the indicated antibodies.

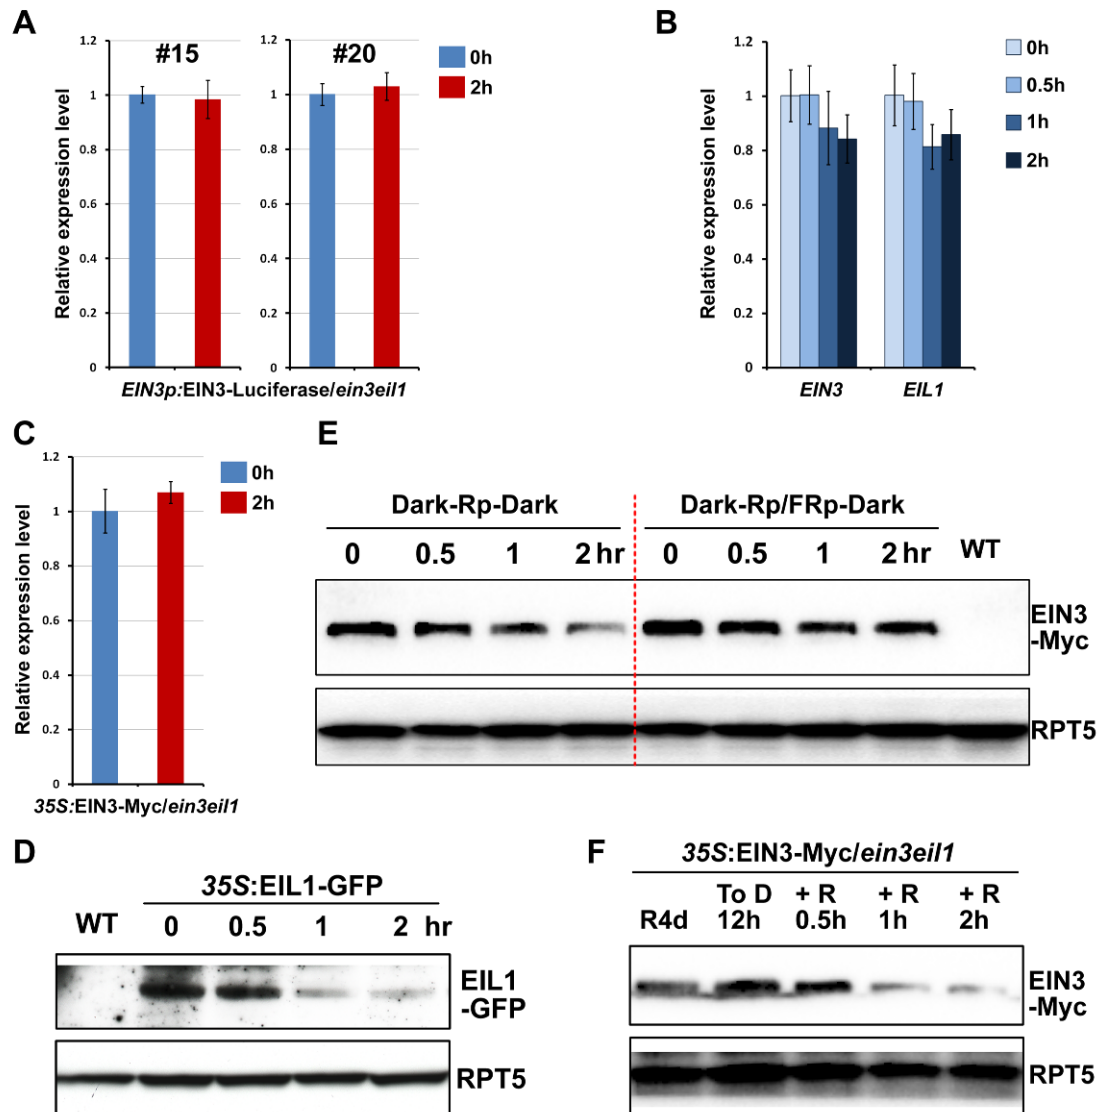

**Figure S2. Light does not significantly affect *EIN3* transcription, and the degradation of *EIN3* protein in red light is dependent on the photoactivated photoreceptors, related to Figure 2.**

(A) qRT-PCR results showing *EIN3* expression of *EIN3p:EIN3-Luciferase/ein3eil1* upon light. Two independent lines of *EIN3p:EIN3-Luciferase/ein3eil1* transgenic plant seedlings were grown in the dark for 4 days and then exposed to red light for 2 hr. Expression was normalized to *PP2A*. Mean  $\pm$  s.d.,  $n=3$ .

(B) qRT-PCR results showing *EIN3* and *EIL1* gene expression in WT. The seedlings were grown in the dark for 4 days and then exposed to red light for the indicated time. Expression was normalized to *PP2A*. Mean  $\pm$  s.d.,  $n=3$ .

(C) qRT-PCR results showing *EIN3* gene expression of *35S:EIN3-Myc/ein3eil1* upon light. The seedlings were grown in the dark for 4 days and then exposed to red light for 2 hr. Expression was normalized to *PP2A*. Mean  $\pm$  s.d., n=3.

(D) Western blot results showing that EIL1 proteins are degraded upon light exposure. Seedlings over-expressing EIL1-GFP were grown in the dark for 4 days (0 hr) and then transferred to red light irradiation for the indicated time. WT was used as a negative control. RPT5 was employed as a loading control.

(E) Western blot results showing the photoreversibility of red light induced-EIN3 protein degradation. The 4-day-old dark-grown *EIN3-Myc/ein3eil1* seedlings were irradiated either by 1 min of red light (Dark-Rp-Dark) or by 1 min of red light immediately followed by 1 min of far-red light pulse (Dark-Rp/FRp-Dark), and then the light-irradiated seedlings were incubated in darkness for the indicated time. WT was used as a negative control. RPT5 was used as a loading control.

(F) Western blot results showing the EIN3 protein levels in the dark-adapted seedlings. The *EIN3-Myc/ein3eil1* seedlings were grown in the red light for 4 days and transferred to darkness for additional 12 hr. The dark-adapted seedlings were then exposure to red light for the indicated time. RPT5 was used as a loading control.

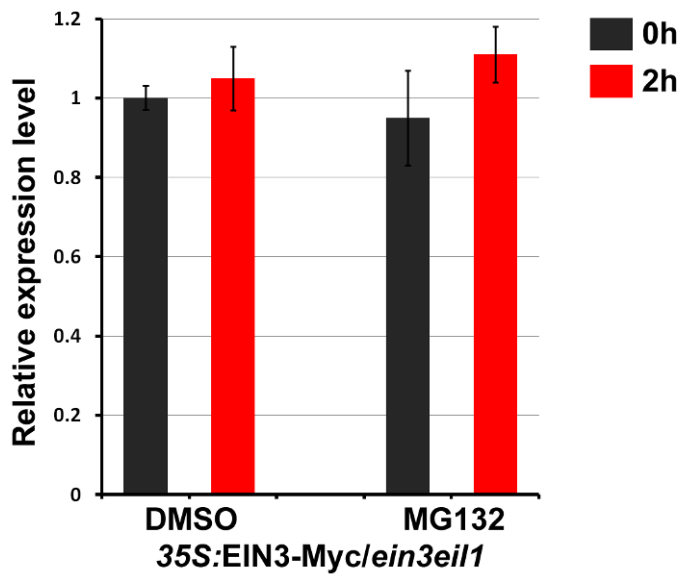

**Figure S3. *EIN3* gene expression is not affected either by light or by MG132 treatment, related to Figure 3.**

qRT-PCR results showing *EIN3* gene expression of *35S:EIN3-Myc/ein3eil1*. The seedlings were grown in the dark for 4 days without (DMSO) or with MG132 (MG132) pretreatment for 12 hr and then exposed to red light for 2 hr. Expression was normalized to *PP2A*. Mean  $\pm$  s.d., n=3.

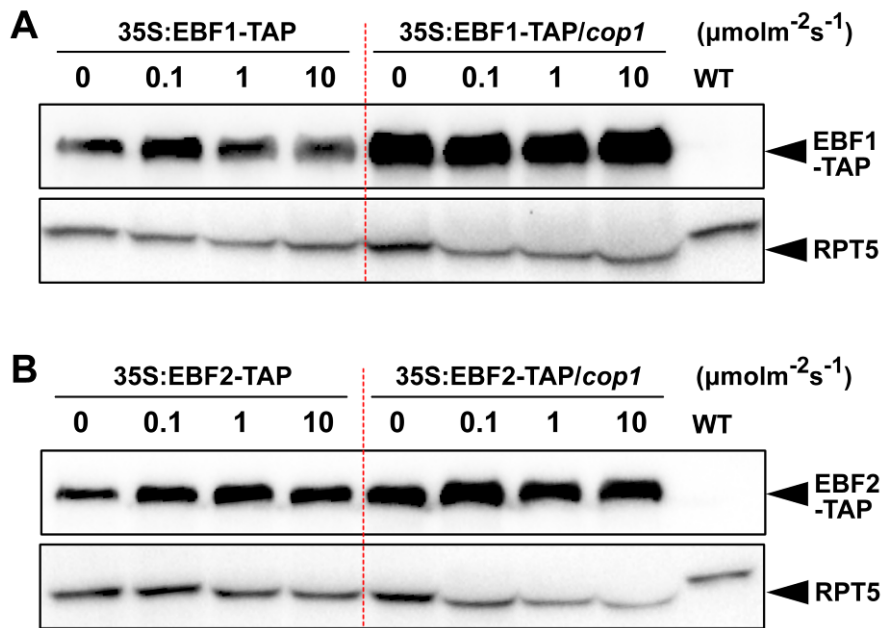

**Figure S4. Continuous light irradiation up-regulates EBF1 and EBF2 protein levels, which is dependent on COP1, related to Figure 5.**

Western blot results showing EBF1-TAP (A) or EBF2-TAP (B) protein levels in WT and *cop1* backgrounds. The seedlings were grown under different fluences ( $\mu\text{molm}^{-2}\text{s}^{-1}$ ) of continuous white light for 4 days. RPT5 was used as a loading control.

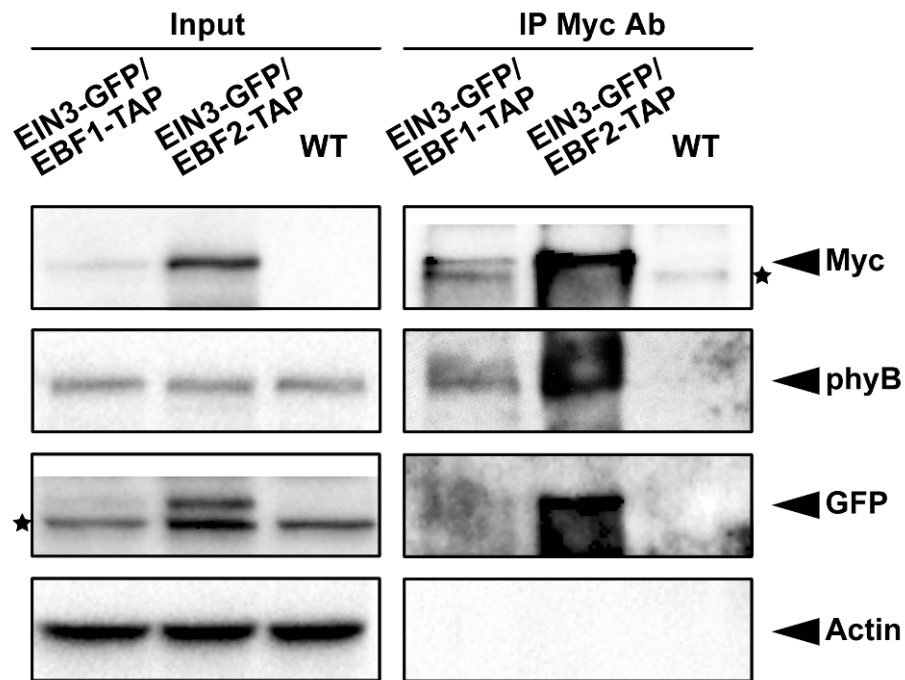

**Figure S5. EIN3, phyB and EBFs form a tripartite complex upon light, related to Figure 6.**

Co-immunoprecipitation assays to determine the existence of EIN3-phyB-EBFs tripartite complex. WT and transgenic plants over-expressing EIN3-GFP in 35S:EBF1-TAP or 35S:EBF2-TAP backgrounds (EIN3-GFP/EBF1-TAP or EIN3-GFP/EBF2-TAP) were grown on 1/2 MS medium for 3.5 days in the dark, and treated by 40  $\mu$ M MG132 for additional 12 h. After that, the seedlings were exposed to red light for 30 min. Extracted total proteins were immunoprecipitated using anti-Myc antibody and immunoblotted using the indicated antibodies. Asterisks represent the nonspecific bands.
